# Supplementary material for: Genomic Risk Prediction for Breast Cancer in Older Women
Source: MDPI journal article supplement (doi:10.3390/cancers13143533), 2021-07-14
Supplement: s1 [file s1]

## Supplementary Materials

# Genomic Risk Prediction for Breast Cancer in Older Women

Paul Lacaze, Andrew Bakshi, Moeen Riaz, Suzanne G. Orchard, Jane Tiller, Johannes T. Neumann, Prudence R. Carr, Amit D. Joshi, Yin Cao, Erica T. Warner, Alisa Manning, Tú Nguyen-Dumont, Melissa C. Southey, Roger L. Milne, Leslie Ford, Robert Sebra, Eric Schadt, Lucy Gately, Peter Gibbs, Bryony A. Thompson, Finlay A. Macrae, Paul James, Ingrid Winship, Catriona McLean, John R. Zalcberg, Robyn L. Woods, Andrew T. Chan, Anne M. Murray and John J. McNeil

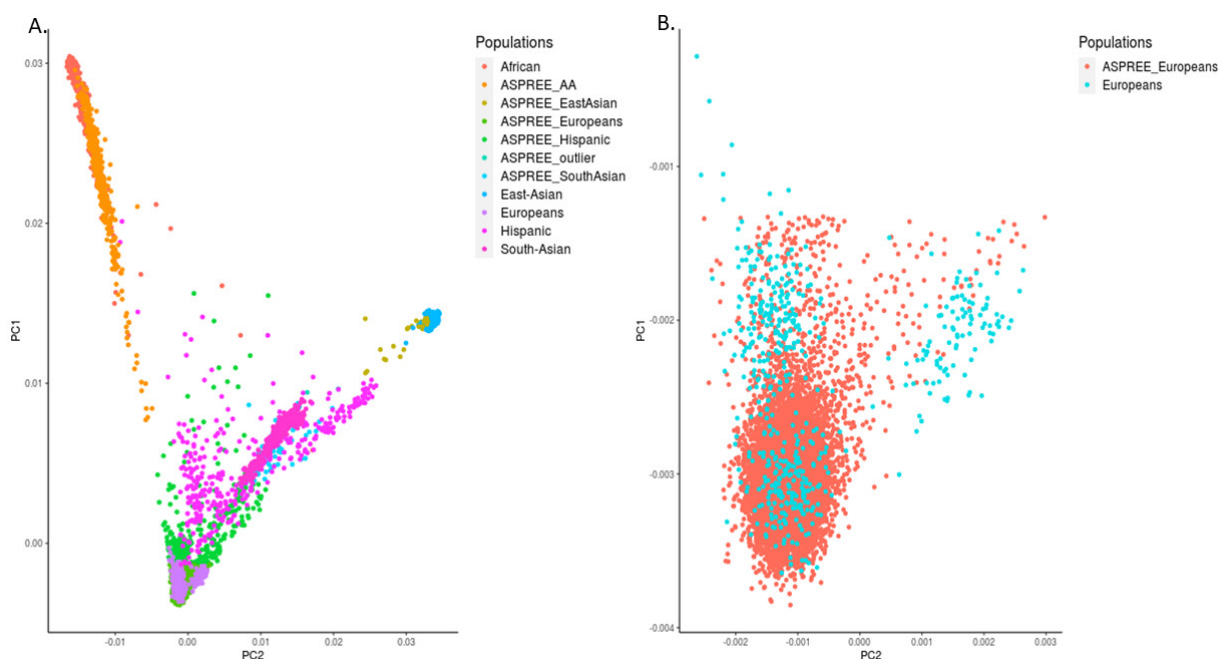

**Figure S1.** Principal component (PC) analysis of the ASPREE cohort compared with the 1000 Genome Project. (A) PC plot of all genotyped ASPREE participants mapped against the 1000 Genome population groups (Europeans, South Asians, East Asians, African American and Hispanics). (ASPREE\_AA = ASPREE participants of African American descent); (B) PC plot of European ASPREE genotyped participants included in the PRS study mapped against the 1000 Genome European population.

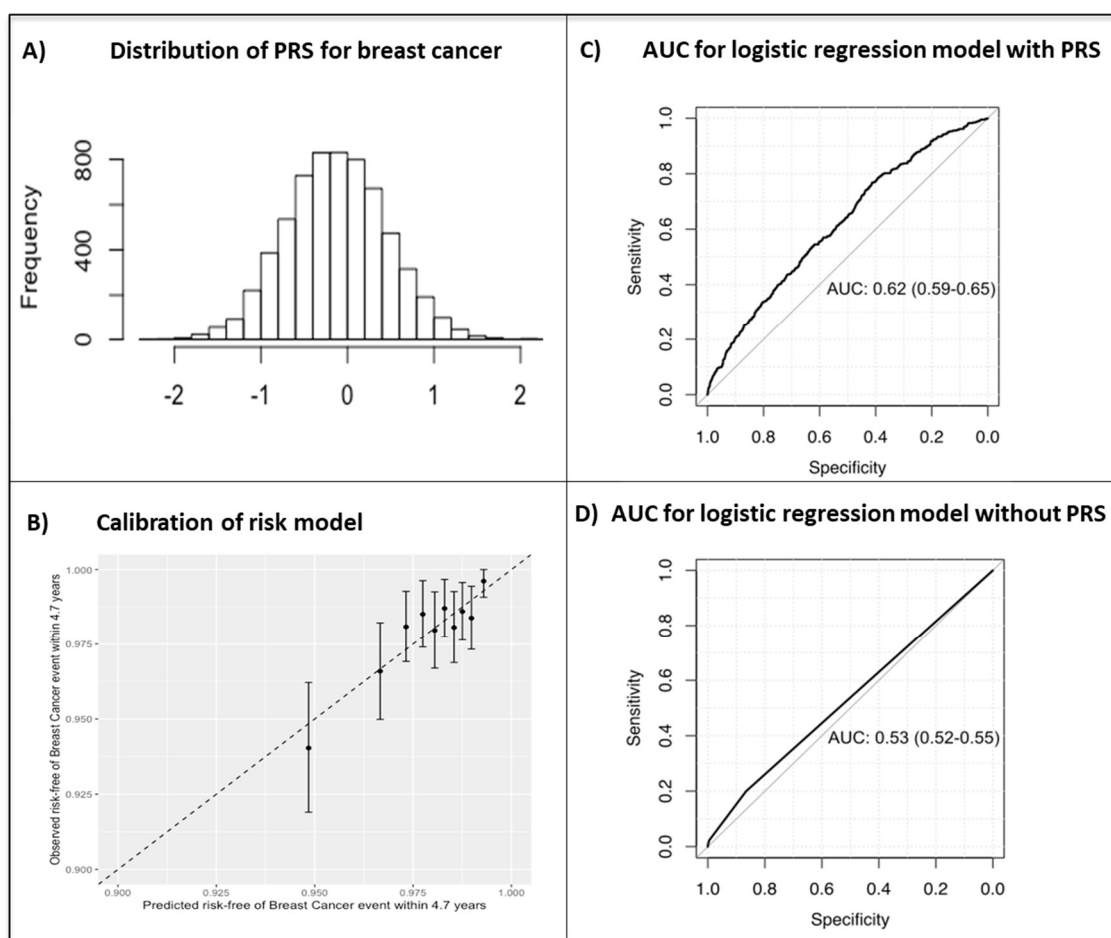

**Figure S2.** Distribution of the PRS, Calibration of the Risk Model (Incident BC), and Area Under the Curve for the Logistic Regression Model (Prevalent BC). **(A)** Distribution of PRS for breast cancer; **(B)** Calibration of Risk Model for Incident BC; **(C)** AUC for Logistic Regression Model with PRS for Prevalent BC; **(D)** AUC for Logistic Regression Model without PRS for Prevalent BC.

**Table S1.** Table of pathogenic variants (PVs) detected in breast cancer susceptibility genes (*BRCA1*, *BRCA2*, *PALB2*, *CHECK2*, *ATM*) in 6339 older women. Variants with a 'pathogenic' or 'likely pathogenic' ClinVar annotation and/or high-confidence predicted loss-of-function in coding regions were curated following ACMG/AMP Standards and Guidelines for the Interpretation of Sequence Variants, including review by two or more laboratory scientists and a clinical geneticist. Analysis was restricted to single nucleotide variants and small insertions/deletions.

| Location<br>(GRCh37) | Gene         | REF   | ALT | Consequence | HGVS                                                                      | rsID        | Curation Call | ASPRE<br>Allele<br>Count | ASPRE<br>MAF<br>(N6339) | Gnomad<br>NFE MAF |
|----------------------|--------------|-------|-----|-------------|---------------------------------------------------------------------------|-------------|---------------|--------------------------|-------------------------|-------------------|
| chr17:41276044       | <i>BRCA1</i> | ACT   | A   | Deletion    | NM_007294.3( <i>BRCA1</i> ):c.68_69delAG,<br>p.(Glu23ValfsTer17)          | rs80357914  | Pathogenic    | 1                        | 0.000158                | 0.000097          |
| chr17:41245528       | <i>BRCA1</i> | GT    | G   | Deletion    | NM_007294.3( <i>BRCA1</i> ):c.2019delA,<br>p.(Glu673AspfsTer28)           | rs80357626  | Pathogenic    | 1                        | 0.000158                | 0                 |
| chr17:41245528       | <i>BRCA1</i> | GAA   | G   | Deletion    | NM_007294.3( <i>BRCA1</i> ):c.798_799delTT,<br>p.(Ser267LysfsTer19)       | rs80357724  | Pathogenic    | 1                        | 0.000158                | 0.000085          |
| chr13:32893291       | <i>BRCA2</i> | G     | T   | stop_gained | NM_000059.3( <i>BRCA2</i> ):c.145G>T,<br>p.(Glu49Ter)                     | rs80358435  | Pathogenic    | 1                        | 0.000158                | 0                 |
| chr13:32912964       | <i>BRCA2</i> | TGAAA | T   | Deletion    | NM_000059.3( <i>BRCA2</i> ):c.4478_4481del<br>AAAG, p.(Glu1493ValfsTer10) | rs80359454  | Pathogenic    | 2                        | 0.00032                 | 0.000035          |
| chr13:32929057       | <i>BRCA2</i> | TTC   | T   | Deletion    | NM_000059.3( <i>BRCA2</i> ):c.7069_7070del<br>CT, p.(Leu2357ValfsTer2)    | rs80359636  | Pathogenic    | 2                        | 0.000158                | 0.000053          |
| chr13:32912337       | <i>BRCA2</i> | CTG   | C   | Deletion    | NM_000059.3( <i>BRCA2</i> ):c.3847_3848del<br>GT, p.(Val1283LysfsTer2)    | rs80359405  | Pathogenic    | 1                        | 0.000158                | 0.000114          |
| chr13:32954180       | <i>BRCA2</i> | CG    | C   | Deletion    | NM_000059.3( <i>BRCA2</i> ):c.9157delG,<br>p.(Glu3053SerfsTer9)           | rs80359750  | Pathogenic    | 1                        | 0.000158                | 0                 |
| chr13:32893460       | <i>BRCA2</i> | T     | G   | stop_gained | NM_000059.3( <i>BRCA2</i> ):c.314T>G,<br>p.(Leu105Ter)                    | rs80358561  | Pathogenic    | 1                        | 0.000158                | 0                 |
| chr13:32914401       | <i>BRCA2</i> | C     | A   | stop_gained | NM_000059.3( <i>BRCA2</i> ):c.5909C>A,<br>p.(Ser1970Ter)                  | rs80358824  | Pathogenic    | 1                        | 0.000158                | 0                 |
| chr13:32912171       | <i>BRCA2</i> | CTG   | C   | Deletion    | NM_000059.3( <i>BRCA2</i> ):c.3680_3681del<br>TG, p.(Leu1227GlnfsTer5)    | rs80359395  | Pathogenic    | 1                        | 0.000158                | 0                 |
| chr11:108199929      | <i>ATM</i>   | T     | G   | SNV         | NM_000051.3( <i>ATM</i> ):c.7271T>G<br>(p.Val2424Gly)                     | rs28904921  | Pathogenic    | 1                        | 0.000158                | 0.000079          |
| chr11:108236203      | <i>ATM</i>   | C     | T   | SNV         | NM_000051.3( <i>ATM</i> ):c.9139C>T<br>(p.Arg3047Ter)                     | rs121434219 | Pathogenic    | 1                        | 0.000158                | 0                 |
| chr11:108143258      | <i>ATM</i>   | G     | A   | SNV         | NM_000051.3( <i>ATM</i> ):c.3078-1G>A                                     | rs750663117 | Pathogenic    | 1                        | 0.000158                | 0.000018          |

|                 |       |                            |   |              |                                                                     |             |                   |   |          |          |
|-----------------|-------|----------------------------|---|--------------|---------------------------------------------------------------------|-------------|-------------------|---|----------|----------|
| chr11:108224608 | ATM   | G                          | A | splice_donor | NM_000051.3(ATM):c.8786+1G>A                                        | rs17174393  | Pathogenic        | 1 | 0.000158 | 0.000035 |
| chr11:108213987 | ATM   | G                          | A | stop_gained  | NM_000051.3(ATM):c.8307G>A<br>(p.Trp2769Ter)                        | rs778269655 | Pathogenic        | 1 | 0.000158 | 0.000009 |
| chr11:108203621 | ATM   | C                          | T | stop_gained  | NM_000051.3(ATM):c.7921C>T<br>(p.Gln2641Ter)                        | rs769523686 | Likely pathogenic | 1 | 0.000158 | 0.000009 |
| chr11:108124740 | ATM   | C                          | T | stop_gained  | NM_000051.3(ATM):c.2098C>T<br>(p.Gln700Ter)                         | rs786202743 | Pathogenic        | 1 | 0.000158 | 0        |
| chr11:108213981 | ATM   | TGAAT<br>GG<br>TGCAC<br>AG | T | Deletion     | NM_001330368.2(C11orf65):c.641-<br>34196_641-34184del               | rs786202318 | Pathogenic        | 1 | 0.000158 | 0        |
| chr11:108225581 | ATM   | ACT                        | A | Deletion     | NM_000051.4(ATM):c.8831_8832CT[1]<br>(p.Leu2945fs)                  | rs786203030 | Pathogenic        | 1 | 0.000158 | 0.000009 |
| chr11:108155007 | ATM   | AG                         | A | Deletion     | NM_001351834.2(ATM):c.3802del<br>(p.Glu1267_Val1268insTer)          | rs587779834 | Pathogenic        | 1 | 0.000158 | 0.000062 |
| chr11:108121752 | ATM   | CAG                        | C | Deletion     | NM_001351834.2(ATM):c.1562_1563G<br>A[1] (p.Glu522fs)               | rs587779817 | Pathogenic        | 1 | 0.000158 | 0.000106 |
| chr11:108196890 | ATM   | CAG                        | C | Deletion     | NM_000051.4(ATM):c.6914_6915AG[1]<br>(p.Leu2307fs)                  | rs878853535 | Pathogenic        | 1 | 0.000158 | 0        |
| chr11:108155055 | ATM   | TA                         | T | Deletion     | NM_000051.3(ATM):c.3850del<br>(p.Thr1284fs)                         | rs876660865 | Pathogenic        | 1 | 0.000158 | 0        |
| chr11:108121479 | ATM   | CTG                        | C | Deletion     | NM_001351834.2(ATM):c.1288_1289T<br>G[1] (p.Cys430_Glu431delinsTer) | rs587781598 | Pathogenic        | 1 | 0.000158 | 0        |
| chr11:108213970 | ATM   | AGT                        | A | Deletion     | NM_000051.3(ATM):c.8292_8293del<br>(p.Ser2764fs)                    | rs879254036 | Pathogenic        | 1 | 0.000158 | 0.000009 |
| chr11:108129762 | ATM   | C                          | A | stop_gained  | NM_000051.3(ATM):c.2426C>A<br>(p.Ser809Ter)                         | rs730881348 | Pathogenic        | 1 | 0.000158 | 0        |
| chr22:29121230  | CHEK2 | C                          | T | splice_donor | NM_007194.4(CHEK2):c.444+1G>T                                       | rs121908698 | Pathogenic        | 1 | 0.000158 | 0.000167 |
| chr22:29120965  | CHEK2 | CT                         | C | Deletion     | NM_007194.4(CHEK2):c.591del<br>(p.Val198fs)                         | rs587782245 | Pathogenic        | 1 | 0.000158 | 0.000035 |
| chr22:29091226  | CHEK2 | TA                         | T | Deletion     | NM_007194.4(CHEK2):c.1263del<br>(p.Ser422fs)                        | rs587780174 | Pathogenic        | 4 | 0.000631 | 0.000088 |
| chr22:29121269  | CHEK2 | AT                         | A | Deletion     | NM_007194.4(CHEK2):c.405del<br>(p.Lys135fs)                         | rs730881699 | Pathogenic        | 1 | 0.000158 | 0        |

|                |              |     |    |             |                                                   |             |            |   |          |          |
|----------------|--------------|-----|----|-------------|---------------------------------------------------|-------------|------------|---|----------|----------|
| chr16:23641149 | <i>PALB2</i> | A   | AT | Duplication | NM_024675.3(PALB2):c.2325dup<br>(p.Phe776fs)      | rs876659997 | Pathogenic | 1 | 0.000158 | 0        |
| chr16:23637576 | <i>PALB2</i> | TAA | T  | Deletion    | NM_024675.3(PALB2):c.2727_2728del<br>(p.Thr911fs) | rs730881869 | Pathogenic | 1 | 0.000158 | 0.000009 |
| chr16:23632683 | <i>PALB2</i> | C   | T  | stop_gained | NM_024675.3(PALB2):c.3113G>A<br>(p.Trp1038Ter)    | rs180177132 | Pathogenic | 4 | 0.000631 | 0.000114 |

**Table S2.** Categorical net reclassification improvement after adding Polygenic Risk Score to the conventional model to predict 4.7-years risk of breast cancer.

| Category               | Conventional Model + Polygenic Risk Score |     |            |     | Total No. of Participants |
|------------------------|-------------------------------------------|-----|------------|-----|---------------------------|
|                        | Conventional Model                        | <1% | 1 to 2.99% | ≥3% |                           |
| Breast Cancer Event    | <1%                                       | 1   | 1          | 0   | 2                         |
|                        | 1 to 2.99%                                | 3   | 56         | 17  | 76                        |
|                        | ≥3%                                       | 0   | 2          | 30  | 32                        |
|                        | Total No. of participants                 | 4   | 59         | 47  | 101                       |
| No Breast Cancer Event | <1%                                       | 162 | 58         | 0   | 220                       |
|                        | 1 to 2.99%                                | 333 | 1726       | 185 | 2244                      |
|                        | ≥3%                                       | 0   | 103        | 238 | 341                       |
|                        | Total No. of participants                 | 495 | 1887       | 423 | 2805                      |

**Table S3.** Receptor Subtypes.

| Receptor Subtype | Incident Cases |
|------------------|----------------|
| ER+              | 9              |
| PR+              | 2              |
| HER2+            | 4              |
| ER+/PR+          | 74             |
| ER+/HER2+        | 3              |
| ER+/PR+/HER2+    | 5              |
| Triple Negative  | 6              |

**Table S4.** Association of rare pathogenic variants (PVs) and a polygenic risk score (PRS) with prevalent breast cancer risk in 6339 older women. We used a logistic regression model to report the Odds Ratio (OR) of rare PVs and the PRS for prevalent BC risk, based on BC cases diagnosed before the time of enrolment (475 self-reported cases).

| Category                                 | PRS as Continuous Variable |              |         | PRS as Categorical Variable |              |         |
|------------------------------------------|----------------------------|--------------|---------|-----------------------------|--------------|---------|
|                                          | Odds Ratio                 | 95% CI       | p-Value | Odds Ratio                  | 95% CI       | p-Value |
| Family History of Breast Cancer *        | 1.41                       | (1.10; 1.80) | 0.006   | 1.43                        | (1.12; 1.83) | 0.004   |
| Pathogenic Variants (N41 carriers)       | 4.69                       | (2.21; 9.27) | <0.001  | 4.64                        | (2.19; 9.15) | <0.001  |
| Polygenic Score (Per Standard Deviation) | 1.47                       | (1.34; 1.61) | <0.001  |                             |              |         |
| Low PRS<br>0–20% (Q1)                    |                            |              |         | Reference                   |              |         |
| Moderate PRS<br>21–80% (Q2,3,4)          |                            |              |         | 2.12                        | (1.56; 2.94) | <0.001  |
| High PRS<br>81–100% (Q5)                 |                            |              |         | 3.16                        | (2.26; 4.49) | <0.001  |

\* Family history in first-degree blood relative (mother, sibling or child). PRS = Polygenic risk score, CI = Confidence interval. Model adjusted for family history of BC (first-degree blood relatives), pathogenic variants (PVs) and PRS.

**Table S5.** Per-gene odds ratios (ORs) for prevalent BC risk in pathogenic variant carriers.

| Gene               | Number of Female Carriers | OR for BC | 95% CI      | p-Value               |
|--------------------|---------------------------|-----------|-------------|-----------------------|
| <i>BRCA1</i>       | 3                         | 18.5      | 1.72–404.61 | $1.85 \times 10^{-2}$ |
| <i>BRCA2</i>       | 10                        | 4.03      | 0.81–15.58  | $5.59 \times 10^{-2}$ |
| <i>ATM</i>         | 16                        | 1.95      | 0.30–7.14   | $3.81 \times 10^{-1}$ |
| <i>PALB2</i>       | 6                         | 7.18      | 0.97–37.93  | $2.54 \times 10^{-2}$ |
| <i>CHEK2</i>       | 7                         | 4.42      | 0.58–22.12  | $9.22 \times 10^{-2}$ |
| <b>Gene Groups</b> |                           |           |             |                       |
| <i>BRCA1/2</i>     | 13                        | 6.09      | 1.77–19.08  | $2.29 \times 10^{-3}$ |
| <i>non-BRCA1/2</i> | 29                        | 3.33      | 1.19–7.92   | $1.14 \times 10^{-2}$ |

Adjusted for family history of breast cancer (first-degree blood relatives) and polygenic risk score (PRS).

**Table S6.** Association of rare pathogenic variants (PVs) and a polygenic risk score (PRS) with prevalent breast cancer risk, stratified by age at diagnosis.

| Header                             | Diagnosis Age <50 yrs<br><i>n</i> = 60 Cases |               |         | Diagnosis Age 50+ years<br><i>n</i> = 415 Cases |              |         |
|------------------------------------|----------------------------------------------|---------------|---------|-------------------------------------------------|--------------|---------|
|                                    | Odds Ratio                                   | 95% CI        | p-Value | Odds Ratio                                      | 95% CI       | p-Value |
| Family History of Breast Cancer *  | 2.09                                         | (1.12; 3.69)  | 0.004   | 1.34                                            | (1.20; 1.74) | 0.03    |
| Pathogenic Variants (N41 carriers) | 9.79                                         | (2.29; 28.87) | 0.02    | 3.91                                            | (1.64; 8.31) | <0.0001 |
| No. of Children †                  | Not available                                |               |         | 0.79                                            | (0.71; 0.88) | <0.0001 |
| Polygenic Score (per std dev)      | 1.39                                         | (1.08; 1.80)  | 0.01    | 1.47                                            | (1.33; 1.63) | <0.0001 |

HR = Hazard ratio, CI = Confidence interval, std dev = Standard deviation. \* Family history in first-degree blood relative (mother, sibling or child). † Assumes all participants had children by age 50. Model adjusted for family history of breast cancer (first-degree blood relatives).

**Table S7.** Chi-squared test ( $\chi^2 = 1.97$ , *df* = 2, *p* = 0.37).

| PRS Group         | Low (1–20) | Med (21–80) | High (81–100) |
|-------------------|------------|-------------|---------------|
| Monogenic case    | 2          | 8           | 1             |
| Monogenic control | 7          | 15          | 8             |

**Table S8.** List of 313 variants in the PRS, indicating variants included in the final ASPREE analysis.

| Chr. | Position  | Effect Allele | Reference Allele | Effect Weight | Allele Freq Effect | ASPREE Included |
|------|-----------|---------------|------------------|---------------|--------------------|-----------------|
| 1    | 100880328 | T             | A                | 0.0373        | 0.4097             | YES             |
| 1    | 10566215  | G             | A                | -0.0586       | 0.329              | YES             |
| 1    | 110198129 | C             | CAAA             | 0.0458        | 0.7755             | NO              |
| 1    | 114445880 | A             | G                | 0.0621        | 0.1664             | YES             |
| 1    | 118141492 | C             | A                | 0.0452        | 0.2657             | YES             |
| 1    | 120257110 | C             | T                | 0.0385        | 0.5309             | YES             |
| 1    | 121280613 | G             | A                | 0.0881        | 0.4053             | YES             |
| 1    | 121287994 | G             | A                | -0.0673       | 0.106              | YES             |
| 1    | 145604302 | CT            | C                | -0.0399       | 0.3515             | NO              |
| 1    | 149906413 | C             | T                | 0.0548        | 0.4017             | YES             |
| 1    | 155556971 | A             | G                | 0.0499        | 0.2302             | YES             |
| 1    | 168171052 | C             | CA               | -0.068        | 0.1097             | NO              |
| 1    | 172328767 | TA            | T                | -0.0435       | 0.3305             | NO              |
| 1    | 18807339  | C             | T                | -0.0564       | 0.5145             | YES             |
| 1    | 201437832 | T             | C                | 0.0917        | 0.0559             | YES             |
| 1    | 202184600 | T             | C                | -0.0065       | 0.3992             | YES             |
| 1    | 203770448 | A             | T                | 0.0498        | 0.2715             | YES             |
| 1    | 204502514 | TTCTGAAACAGGG | T                | -0.0321       | 0.8028             | YES             |
| 1    | 208076291 | A             | G                | -0.0366       | 0.3337             | YES             |
| 1    | 217053815 | G             | T                | 0.0417        | 0.328              | YES             |
| 1    | 217220574 | A             | G                | -0.044        | 0.2107             | YES             |
| 1    | 220671050 | T             | C                | 0.0418        | 0.2415             | YES             |
| 1    | 242034263 | G             | A                | 0.1428        | 0.0305             | YES             |
| 1    | 41380440  | T             | C                | 0.0426        | 0.6438             | YES             |
| 1    | 41389220  | C             | T                | 0.155         | 0.0169             | YES             |
| 1    | 46670206  | T             | TC               | 0.0447        | 0.2973             | YES             |
| 1    | 51467096  | C             | CT               | 0.0374        | 0.48               | YES             |
| 1    | 7917076   | A             | G                | -0.0409       | 0.3899             | YES             |
| 1    | 88156923  | A             | G                | 0.0494        | 0.1487             | YES             |
| 1    | 88428199  | A             | C                | -0.0387       | 0.2477             | YES             |
| 2    | 10138983  | C             | T                | 0.0603        | 0.116              | NO              |
| 2    | 121058254 | G             | A                | -0.0334       | 0.7047             | YES             |
| 2    | 121089731 | C             | T                | -0.0427       | 0.1943             | YES             |
| 2    | 121159205 | A             | G                | -0.044        | 0.3527             | YES             |
| 2    | 121246568 | C             | T                | 0.0992        | 0.897              | YES             |
| 2    | 172974566 | G             | C                | -0.0473       | 0.4743             | YES             |
| 2    | 174212910 | G             | A                | 0.0593        | 0.845              | YES             |
| 2    | 192381934 | T             | C                | 0.0316        | 0.8588             | YES             |
| 2    | 19315675  | A             | T                | -0.0331       | 0.5599             | YES             |
| 2    | 202204741 | C             | T                | -0.0492       | 0.721              | YES             |
| 2    | 217920769 | T             | G                | -0.1318       | 0.5001             | YES             |
| 2    | 217955896 | G             | GA               | -0.2016       | 0.0382             | NO              |
| 2    | 218292158 | G             | C                | -0.0757       | 0.7309             | YES             |
| 2    | 218714845 | A             | G                | -0.0431       | 0.3917             | YES             |
| 2    | 241388857 | A             | C                | -0.1232       | 0.9772             | YES             |
| 2    | 25129473  | G             | A                | -0.0427       | 0.4082             | YES             |
| 2    | 29179452  | C             | G                | -0.0066       | 0.2287             | YES             |
| 2    | 29615233  | C             | T                | -0.0427       | 0.2622             | YES             |
| 2    | 39699510  | CT            | C                | -0.0402       | 0.4659             | NO              |
| 2    | 70172587  | A             | G                | -0.0412       | 0.2787             | YES             |
| 2    | 88358825  | C             | G                | 0.0473        | 0.3081             | YES             |
| 3    | 141112859 | C             | CTT              | 0.0551        | 0.4149             | NO              |



|   |           |     |         |         |        |     |
|---|-----------|-----|---------|---------|--------|-----|
| 3 | 172285237 | A   | G       | 0.0422  | 0.2131 | YES |
| 3 | 189774456 | T   | C       | -0.0478 | 0.2235 | YES |
| 3 | 27353716  | A   | C       | 0.0748  | 0.5259 | YES |
| 3 | 27388664  | G   | C       | 0.0502  | 0.2735 | YES |
| 3 | 29294845  | T   | C       | -0.1281 | 0.0163 | YES |
| 3 | 30684907  | T   | C       | 0.0592  | 0.2975 | YES |
| 3 | 46888198  | C   | T       | -0.0806 | 0.1032 | YES |
| 3 | 4742251   | G   | A       | 0.0616  | 0.3802 | YES |
| 3 | 49709912  | CT  | C       | -0.0367 | 0.2873 | YES |
| 3 | 55970777  | AT  | A       | -0.1195 | 0.0305 | YES |
| 3 | 59373745  | T   | C       | -0.0394 | 0.4294 | YES |
| 3 | 63887449  | TTG | T       | 0.0648  | 0.1297 | YES |
| 3 | 71620370  | G   | T       | -0.0374 | 0.6382 | YES |
| 3 | 87037543  | G   | A       | -0.0723 | 0.0921 | YES |
| 3 | 99403877  | A   | G       | -0.0376 | 0.4852 | YES |
| 4 | 106069013 | T   | G       | 0.0471  | 0.2289 | YES |
| 4 | 126752992 | AAT | A       | -0.0377 | 0.5167 | NO  |
| 4 | 143467195 | T   | C       | -0.0569 | 0.1115 | YES |
| 4 | 151218296 | C   | CATATTT | 0.0388  | 0.6533 | YES |
| 4 | 175842495 | A   | G       | -0.0898 | 0.1161 | YES |
| 4 | 175847436 | A   | C       | 0.0348  | 0.3433 | YES |
| 4 | 187503758 | T   | A       | 0.0357  | 0.4471 | NO  |
| 4 | 38784633  | T   | G       | 0.0489  | 0.2493 | YES |
| 4 | 84370124  | TA  | TAA     | -0.0464 | 0.5324 | YES |
| 4 | 89240476  | A   | G       | 0.0352  | 0.4395 | YES |
| 4 | 92594859  | T   | TTCTTTC | -0.0407 | 0.4445 | NO  |
| 5 | 104300273 | T   | G       | -0.0487 | 0.181  | YES |
| 5 | 122478676 | A   | C       | -0.0386 | 0.7448 | YES |
| 5 | 122705244 | T   | C       | 0.0944  | 0.0306 | YES |
| 5 | 1279790   | T   | C       | 0.0617  | 0.2592 | YES |
| 5 | 1296255   | AG  | A       | -0.0549 | 0.3072 | YES |
| 5 | 131640536 | G   | A       | 0.0392  | 0.5427 | YES |
| 5 | 132407058 | T   | C       | -0.0388 | 0.245  | YES |
| 5 | 1353077   | C   | T       | 0.1552  | 0.0121 | YES |
| 5 | 158244083 | T   | C       | -0.0677 | 0.5683 | YES |
| 5 | 16231194  | C   | G       | -0.0426 | 0.5594 | YES |
| 5 | 169591460 | C   | T       | 0.0412  | 0.3345 | YES |
| 5 | 173358154 | A   | G       | 0.0365  | 0.4074 | YES |
| 5 | 176134882 | C   | T       | 0.0363  | 0.5422 | YES |
| 5 | 2777029   | A   | G       | 0.0391  | 0.4139 | YES |
| 5 | 32579616  | T   | TCA     | 0.0363  | 0.4844 | YES |
| 5 | 345109    | C   | T       | 0.084   | 0.0544 | NO  |
| 5 | 44508264  | GT  | G       | -0.1177 | 0.1265 | NO  |
| 5 | 44619502  | G   | A       | -0.1101 | 0.1549 | YES |
| 5 | 44649944  | T   | C       | 0.0492  | 0.601  | YES |
| 5 | 44706498  | G   | A       | 0.0497  | 0.2481 | YES |
| 5 | 44853593  | C   | G       | -0.0336 | 0.3081 | YES |
| 5 | 52679539  | CA  | C       | 0.0571  | 0.0998 | NO  |
| 5 | 55662540  | CT  | C       | -0.0458 | 0.3631 | NO  |
| 5 | 55965167  | T   | C       | 0.0394  | 0.5576 | YES |
| 5 | 56023083  | G   | T       | 0.1366  | 0.1583 | YES |
| 5 | 56042972  | T   | C       | 0.0865  | 0.0521 | YES |
| 5 | 56045081  | C   | T       | -0.0564 | 0.1655 | YES |
| 5 | 58241712  | T   | C       | -0.0434 | 0.575  | NO  |
| 5 | 71965007  | A   | G       | -0.041  | 0.2572 | YES |
| 5 | 73234583  | C   | T       | -0.0363 | 0.3213 | YES |

|   |           |     |          |         |        |     |
|---|-----------|-----|----------|---------|--------|-----|
| 5 | 77155397  | G   | GT       | -0.0408 | 0.3466 | YES |
| 5 | 79180995  | GA  | G        | 0.0328  | 0.1755 | YES |
| 5 | 81512947  | T   | TA       | -0.0598 | 0.2503 | YES |
| 5 | 90789470  | A   | G        | -0.0564 | 0.158  | YES |
| 6 | 130341728 | CT  | C        | 0.0472  | 0.7116 | YES |
| 6 | 13713366  | C   | G        | -0.0553 | 0.5691 | YES |
| 6 | 149595505 | C   | T        | -0.0476 | 0.2061 | YES |
| 6 | 151949806 | C   | A        | 0.0703  | 0.3083 | YES |
| 6 | 151955914 | G   | A        | 0.1449  | 0.0713 | NO  |
| 6 | 152022664 | C   | CAAAAAAA | 0.0137  | 0.6119 | NO  |
| 6 | 152023191 | A   | G        | 0.0626  | 0.3965 | YES |
| 6 | 152055978 | T   | A        | 0.074   | 0.0627 | YES |
| 6 | 152432902 | T   | C        | 0.0649  | 0.5146 | YES |
| 6 | 16399557  | T   | C        | -0.0373 | 0.3299 | YES |
| 6 | 169006947 | G   | C        | -0.0308 | 0.5202 | YES |
| 6 | 170332621 | C   | T        | 0.0373  | 0.6158 | YES |
| 6 | 18783140  | A   | G        | 0.0326  | 0.62   | YES |
| 6 | 20537845  | C   | CA       | -0.0391 | 0.4733 | YES |
| 6 | 21923810  | C   | T        | -0.0321 | 0.4303 | YES |
| 6 | 27425644  | C   | G        | -0.0737 | 0.0815 | YES |
| 6 | 43227141  | A   | G        | -0.064  | 0.0985 | YES |
| 6 | 82263549  | A   | AAT      | 0.0477  | 0.4262 | YES |
| 6 | 85912194  | C   | CAA      | 0.0762  | 0.0604 | YES |
| 6 | 87803819  | C   | T        | 0.0383  | 0.277  | NO  |
| 7 | 101552440 | A   | G        | -0.0568 | 0.1255 | NO  |
| 7 | 102481842 | C   | T        | 0.0418  | 0.3416 | YES |
| 7 | 130656911 | T   | C        | -0.0476 | 0.3734 | YES |
| 7 | 130674481 | A   | G        | 0.0416  | 0.2971 | YES |
| 7 | 139943702 | C   | CT       | 0.0582  | 0.5381 | NO  |
| 7 | 144048902 | T   | G        | -0.0563 | 0.2284 | NO  |
| 7 | 21940960  | G   | A        | -0.0467 | 0.3515 | YES |
| 7 | 25569548  | T   | C        | -0.0486 | 0.1667 | YES |
| 7 | 28869017  | A   | G        | -0.0572 | 0.1072 | YES |
| 7 | 55192256  | C   | A        | -0.0349 | 0.5497 | YES |
| 7 | 91459189  | ATT | A        | 0.0452  | 0.3286 | YES |
| 7 | 94113799  | C   | T        | 0.0449  | 0.2792 | YES |
| 7 | 98005235  | A   | G        | -0.0467 | 0.1627 | YES |
| 7 | 99948655  | G   | T        | 0.042   | 0.2109 | NO  |
| 8 | 102483100 | C   | T        | 0.0593  | 0.0967 | YES |
| 8 | 106358620 | T   | A        | -0.0745 | 0.1003 | YES |
| 8 | 117209548 | G   | A        | -0.0417 | 0.6445 | YES |
| 8 | 120862186 | G   | A        | 0.0527  | 0.1318 | YES |
| 8 | 124563705 | C   | T        | 0.0477  | 0.1458 | YES |
| 8 | 124571581 | A   | G        | 0.034   | 0.4173 | YES |
| 8 | 124739913 | G   | T        | 0.0466  | 0.3985 | YES |
| 8 | 128213561 | CA  | C        | -0.043  | 0.4153 | YES |
| 8 | 128370949 | G   | C        | 0.0642  | 0.402  | YES |
| 8 | 128372172 | G   | A        | 0.0597  | 0.5446 | YES |
| 8 | 129199566 | A   | G        | 0.0615  | 0.1717 | YES |
| 8 | 143669254 | G   | A        | -0.0346 | 0.339  | YES |
| 8 | 170692    | C   | T        | 0.0477  | 0.2227 | YES |
| 8 | 17787610  | C   | CT       | -0.0377 | 0.623  | NO  |
| 8 | 23447496  | G   | A        | -0.0389 | 0.6487 | YES |
| 8 | 23663653  | A   | C        | 0.0335  | 0.4032 | YES |
| 8 | 29509616  | C   | A        | -0.0601 | 0.6756 | YES |
| 8 | 36858483  | G   | A        | -0.076  | 0.182  | YES |

|    |           |    |       |         |        |     |
|----|-----------|----|-------|---------|--------|-----|
| 8  | 76230943  | G  | A     | 0.0755  | 0.8282 | YES |
| 8  | 76333056  | T  | C     | 0.1129  | 0.0878 | YES |
| 8  | 76378165  | T  | G     | -0.0391 | 0.3595 | YES |
| 9  | 110303808 | T  | TAA   | 0.0797  | 0.2065 | YES |
| 9  | 110837073 | G  | A     | 0.1158  | 0.063  | YES |
| 9  | 110837176 | T  | C     | 0.0653  | 0.175  | YES |
| 9  | 110849525 | T  | G     | 0.0153  | 0.5977 | YES |
| 9  | 110885479 | T  | C     | 0.0877  | 0.6222 | YES |
| 9  | 119313486 | G  | A     | -0.0462 | 0.4087 | YES |
| 9  | 129424719 | G  | A     | -0.0382 | 0.4577 | YES |
| 9  | 136146597 | T  | C     | 0.04    | 0.2727 | YES |
| 9  | 21964882  | C  | CAAAA | 0.055   | 0.3184 | NO  |
| 9  | 22041998  | G  | C     | 0.0289  | 0.1393 | YES |
| 9  | 36928288  | C  | T     | 0.0249  | 0.5349 | YES |
| 9  | 6880263   | G  | A     | 0.0348  | 0.2855 | YES |
| 9  | 87782211  | C  | T     | 0.0361  | 0.5094 | YES |
| 9  | 98362587  | C  | T     | 0.0576  | 0.094  | YES |
| 10 | 114777670 | T  | C     | 0.0472  | 0.4631 | YES |
| 10 | 115128491 | C  | T     | -0.0592 | 0.7846 | YES |
| 10 | 123095209 | A  | G     | -0.0538 | 0.3269 | YES |
| 10 | 123340107 | G  | A     | 0.1508  | 0.0656 | YES |
| 10 | 123340431 | G  | GC    | -0.2408 | 0.5963 | YES |
| 10 | 123349324 | T  | A     | -0.2609 | 0.0484 | YES |
| 10 | 13892298  | A  | G     | 0.0371  | 0.4376 | YES |
| 10 | 22032942  | G  | A     | -0.058  | 0.7085 | YES |
| 10 | 22477776  | A  | ACC   | 0.1687  | 0.0202 | NO  |
| 10 | 22861490  | C  | A     | 0.0875  | 0.937  | YES |
| 10 | 38523626  | A  | C     | 0.0404  | 0.3698 | NO  |
| 10 | 5794652   | G  | A     | 0.047   | 0.2137 | YES |
| 10 | 64299890  | G  | A     | -0.1345 | 0.1603 | YES |
| 10 | 64819996  | T  | G     | 0.0472  | 0.1958 | YES |
| 10 | 71335574  | T  | C     | -0.0404 | 0.3179 | NO  |
| 10 | 80851257  | T  | G     | -0.0805 | 0.6172 | YES |
| 10 | 80886726  | G  | A     | 0.0762  | 0.1631 | YES |
| 10 | 95292187  | C  | CAA   | -0.0512 | 0.8234 | NO  |
| 11 | 103614438 | G  | T     | 0.0147  | 0.6572 | YES |
| 11 | 108267402 | CA | C     | -0.0022 | 0.4173 | NO  |
| 11 | 111696440 | C  | T     | -0.0396 | 0.6221 | YES |
| 11 | 116727936 | T  | A     | -0.0423 | 0.2046 | YES |
| 11 | 122966626 | G  | A     | -0.0383 | 0.2922 | YES |
| 11 | 129243417 | G  | T     | -0.0543 | 0.862  | YES |
| 11 | 129461016 | G  | A     | 0.0453  | 0.6016 | YES |
| 11 | 18664241  | G  | T     | 0.0461  | 0.7293 | YES |
| 11 | 1895708   | A  | C     | -0.0762 | 0.3924 | YES |
| 11 | 42844441  | T  | C     | -0.0336 | 0.3279 | YES |
| 11 | 433617    | C  | T     | -0.0437 | 0.7969 | YES |
| 11 | 44368892  | A  | G     | 0.0374  | 0.5495 | YES |
| 11 | 46318032  | G  | C     | -0.0748 | 0.0659 | YES |
| 11 | 65553492  | A  | C     | 0.0425  | 0.1867 | YES |
| 11 | 65572431  | A  | G     | -0.0347 | 0.4886 | YES |
| 11 | 69328130  | T  | A     | -0.0423 | 0.213  | YES |
| 11 | 69330983  | A  | G     | 0.1022  | 0.125  | YES |
| 11 | 69331418  | T  | C     | 0.1782  | 0.0753 | YES |
| 11 | 803017    | G  | A     | 0.0457  | 0.5167 | YES |
| 12 | 103097887 | T  | C     | 0.0546  | 0.1175 | YES |
| 12 | 111600134 | T  | G     | -0.0442 | 0.3715 | YES |

|    |           |    |        |         |        |     |
|----|-----------|----|--------|---------|--------|-----|
| 12 | 115108136 | C  | T      | 0.0465  | 0.2615 | YES |
| 12 | 115796577 | G  | A      | -0.0428 | 0.1959 | YES |
| 12 | 115835836 | C  | T      | -0.0813 | 0.4171 | YES |
| 12 | 120832146 | T  | C      | 0.0516  | 0.1593 | YES |
| 12 | 14413931  | C  | G      | 0.0484  | 0.2619 | YES |
| 12 | 28149568  | T  | C      | -0.062  | 0.117  | YES |
| 12 | 28174817  | T  | C      | -0.0856 | 0.2421 | YES |
| 12 | 28347382  | T  | C      | -0.0521 | 0.2153 | YES |
| 12 | 29140260  | A  | G      | 0.0647  | 0.9126 | YES |
| 12 | 293626    | G  | A      | 0.0401  | 0.3711 | YES |
| 12 | 57146069  | G  | T      | -0.0579 | 0.1037 | YES |
| 12 | 70798355  | T  | A      | 0.0469  | 0.181  | YES |
| 12 | 83064195  | GA | G      | 0.0671  | 0.0992 | YES |
| 12 | 85004551  | T  | C      | 0.0348  | 0.4955 | YES |
| 12 | 96027759  | G  | A      | -0.0867 | 0.2963 | YES |
| 13 | 32839990  | A  | G      | 0.0424  | 0.0174 | YES |
| 13 | 32972626  | T  | A      | 0.2687  | 0.0079 | YES |
| 13 | 43501356  | G  | A      | 0.0517  | 0.8303 | YES |
| 13 | 73806982  | C  | T      | 0.0345  | 0.3153 | YES |
| 13 | 73960952  | G  | A      | 0.0399  | 0.7618 | YES |
| 14 | 105213978 | G  | T      | 0.0399  | 0.4588 | YES |
| 14 | 37128564  | A  | C      | -0.0733 | 0.2122 | YES |
| 14 | 37228504  | T  | C      | 0.039   | 0.4434 | YES |
| 14 | 68660428  | C  | T      | -0.0474 | 0.8345 | YES |
| 14 | 68979835  | C  | T      | -0.0911 | 0.2581 | YES |
| 14 | 91751788  | T  | TC     | 0.038   | 0.6934 | YES |
| 14 | 91841069  | G  | A      | 0.0513  | 0.3444 | YES |
| 14 | 93070286  | T  | C      | -0.0577 | 0.1709 | YES |
| 15 | 100905819 | C  | A      | -0.0608 | 0.11   | YES |
| 15 | 46680811  | A  | C      | -0.1973 | 0.0115 | YES |
| 15 | 50694306  | G  | A      | -0.0417 | 0.3446 | YES |
| 15 | 66630569  | A  | G      | -0.0369 | 0.6413 | YES |
| 15 | 67457698  | G  | A      | 0.0782  | 0.0496 | YES |
| 15 | 75750383  | C  | T      | -0.0413 | 0.2604 | YES |
| 15 | 91512267  | T  | G      | -0.0589 | 0.1353 | YES |
| 16 | 10706580  | A  | G      | -0.074  | 0.0695 | YES |
| 16 | 23007047  | T  | G      | 0.1218  | 0.0236 | YES |
| 16 | 4008542   | C  | CAAAAA | -0.0329 | 0.8213 | NO  |
| 16 | 4106788   | A  | C      | -0.03   | 0.2643 | YES |
| 16 | 52538825  | A  | C      | 0.1147  | 0.2562 | YES |
| 16 | 52599188  | T  | C      | 0.107   | 0.2406 | YES |
| 16 | 53809123  | T  | C      | -0.0704 | 0.4201 | YES |
| 16 | 53861139  | T  | C      | -0.0338 | 0.7604 | YES |
| 16 | 53861592  | A  | G      | -0.0337 | 0.3663 | YES |
| 16 | 54682064  | A  | G      | 0.0477  | 0.485  | YES |
| 16 | 6963972   | G  | C      | 0.0354  | 0.7835 | YES |
| 16 | 80648296  | G  | A      | 0.0839  | 0.2303 | YES |
| 16 | 85145977  | C  | T      | -0.0211 | 0.4856 | YES |
| 16 | 87086492  | C  | T      | -0.0469 | 0.2586 | YES |
| 17 | 29168077  | T  | G      | -0.0568 | 0.2613 | NO  |
| 17 | 39251123  | C  | T      | 0.0799  | 0.0682 | YES |
| 17 | 40127060  | C  | T      | 0.0174  | 0.057  | YES |
| 17 | 40485239  | T  | G      | -0.0571 | 0.0874 | YES |
| 17 | 40744470  | A  | G      | 0.2017  | 0.0124 | YES |
| 17 | 43212339  | CT | C      | 0.0438  | 0.2284 | NO  |
| 17 | 44283858  | A  | G      | -0.054  | 0.1895 | NO  |

|    |          |           |       |         |        |     |
|----|----------|-----------|-------|---------|--------|-----|
| 17 | 53209774 | C         | A     | −0.0793 | 0.3023 | NO  |
| 17 | 77781725 | G         | A     | −0.0401 | 0.5038 | YES |
| 18 | 11696613 | T         | C     | −0.0381 | 0.1379 | YES |
| 18 | 20634253 | T         | C     | −0.0415 | 0.6403 | YES |
| 18 | 24125857 | C         | T     | 0.0346  | 0.4214 | YES |
| 18 | 24337424 | G         | C     | 0.0455  | 0.6205 | YES |
| 18 | 24518050 | A         | AT    | −0.0599 | 0.2773 | YES |
| 18 | 25407513 | G         | C     | 0.0399  | 0.7126 | YES |
| 18 | 29981526 | A         | G     | −0.1058 | 0.0474 | YES |
| 18 | 42411803 | C         | G     | −0.0877 | 0.0717 | YES |
| 18 | 42888797 | C         | T     | −0.0542 | 0.3519 | YES |
| 19 | 13249921 | T         | G     | 0.0956  | 0.0513 | YES |
| 19 | 17393925 | A         | C     | 0.0378  | 0.2958 | YES |
| 19 | 18569492 | T         | C     | −0.0719 | 0.3481 | YES |
| 19 | 19517054 | CGGGCG    | C     | 0.0437  | 0.3537 | NO  |
| 19 | 44283031 | C         | T     | 0.0619  | 0.3519 | YES |
| 19 | 46166073 | C         | T     | −0.036  | 0.6074 | YES |
| 19 | 55816678 | T         | C     | −0.0359 | 0.3626 | YES |
| 20 | 11379842 | C         | T     | 0.0844  | 0.9483 | YES |
| 20 | 41613706 | G         | C     | 0.0315  | 0.7928 | YES |
| 20 | 52296849 | A         | G     | 0.044   | 0.24   | YES |
| 20 | 5948227  | A         | G     | 0.076   | 0.0628 | YES |
| 21 | 16364756 | G         | T     | 0.0646  | 0.1732 | YES |
| 21 | 16566350 | G         | A     | 0.0595  | 0.0873 | YES |
| 21 | 16574455 | A         | C     | −0.0707 | 0.3167 | YES |
| 21 | 47762932 | A         | G     | 0.0946  | 0.0355 | YES |
| 22 | 19766137 | T         | C     | −0.0367 | 0.3798 | YES |
| 22 | 29121087 | G         | A     | 0.1839  | 0.0054 | YES |
| 22 | 29135543 | A         | G     | 0.0654  | 0.087  | YES |
| 22 | 29203724 | T         | C     | 0.1405  | 0.0209 | YES |
| 22 | 29551872 | G         | A     | −0.1716 | 0.9846 | YES |
| 22 | 38583315 | AAAAGAAAG | AAAAG | −0.0471 | 0.2805 | YES |
| 22 | 39343916 | A         | T     | 0.0407  | 0.2541 | YES |
| 22 | 40904707 | C         | CT    | 0.1148  | 0.1099 | YES |
| 22 | 43433100 | T         | C     | −0.06   | 0.1144 | YES |
| 22 | 45319953 | A         | G     | −0.0134 | 0.4166 | NO  |
| 22 | 46283297 | A         | G     | 0.0736  | 0.1117 | YES |

Chr = Chromosome, Freq = Frequency.

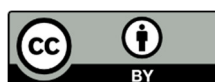

© 2021 by the authors. Licensee MDPI, Basel, Switzerland. This article is an open access article distributed under the terms and conditions of the Creative Commons Attribution (CC BY) license (<http://creativecommons.org/licenses/by/4.0/>).
